# Supplementary material
Source: publisher figshare collection journal article supplement (https://tandf.figshare.com/ndownloader/files/16702238)
Supplement: Supplementary file 1 [file 16702238]

**Supporting information：**

The effect of EVA PWI on the viscosity/apparent viscosity of the model waxy oils is described in Figure S1. Obviously, adding the EVA PWI can improve the flowability of the oil samples at temperatures ≤ WAT, and the improving efficiency enhances with the increase of EVA concentration.

**Figure S1.** Viscosity-temperature curves of model waxy oils.


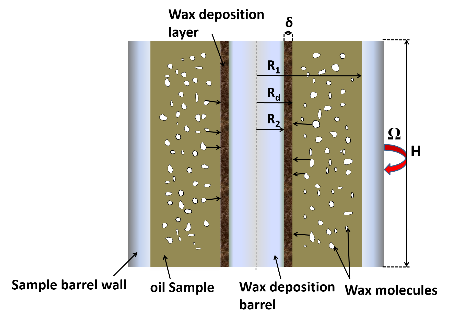


**Figure S2****.** Schematic diagram of the in-house Couette rotating wax deposition device.

Sample barrel

Lifting mechanism

Hot bath

Conveyor

Torque sensor

Cold bath

**Figure S****3.** Structure of the in-house Couette rotating wax deposition device.


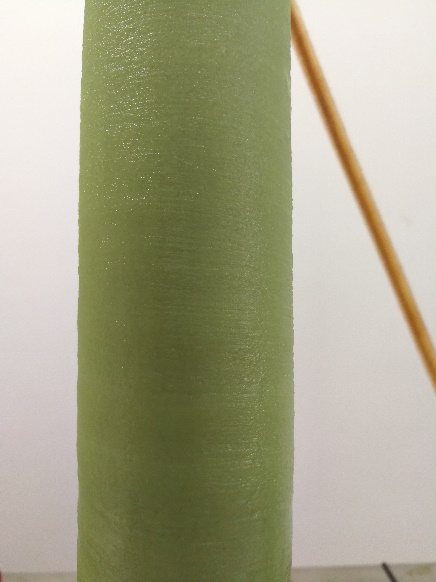
**(a)**


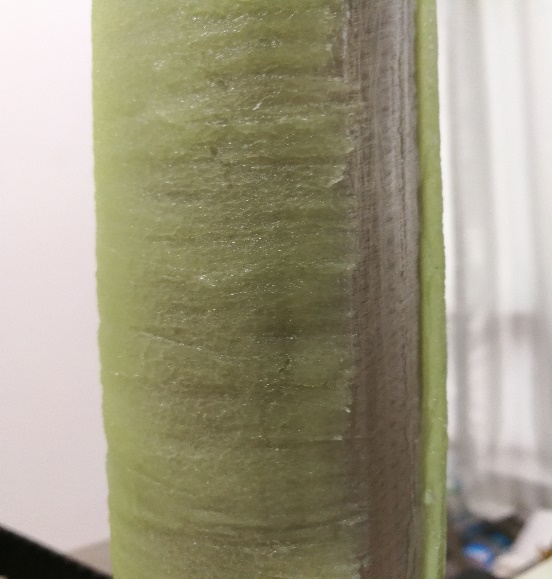
**(b)**

**Figure S4.** Macroscopic morphologies of the surface (a) and bottom (b) wax deposits formed by synthetic oil Ⅲ at 6h, and DSC properties (c) and wax precipitation characteristics (d) of the surface/bottom wax deposit.


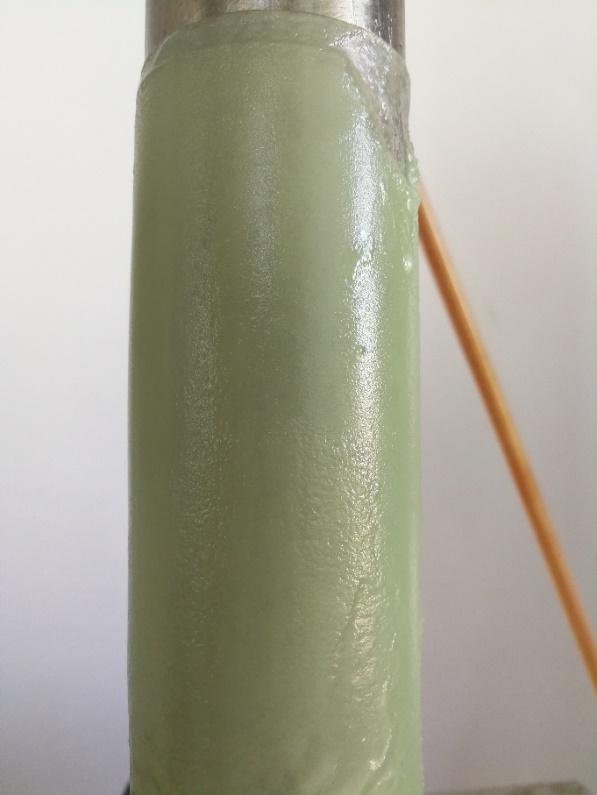
**(a)**


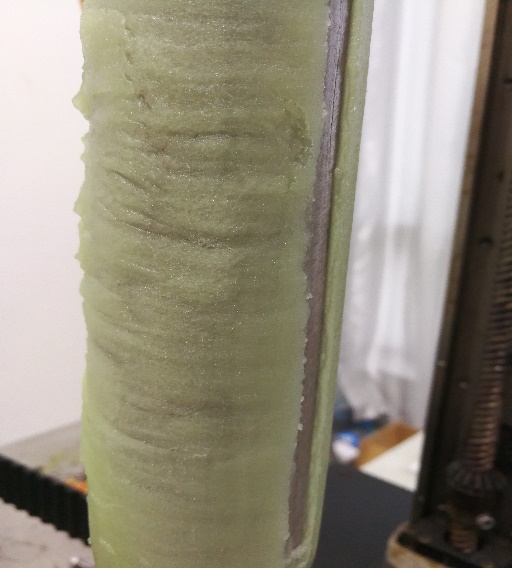
**(b)**

**Figure S5.** Macroscopic morphologies of the surface (a) and bottom (b) wax deposits formed by synthetic oil Ⅳ at 6h, and DSC properties (c) and wax precipitation characteristics (d) of the surface/bottom wax deposit.


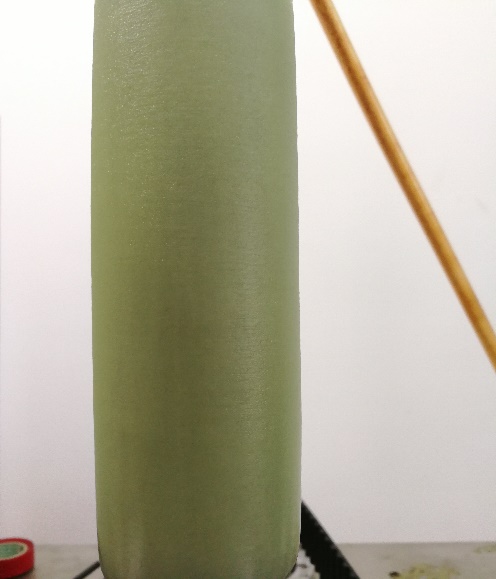
**(a)**


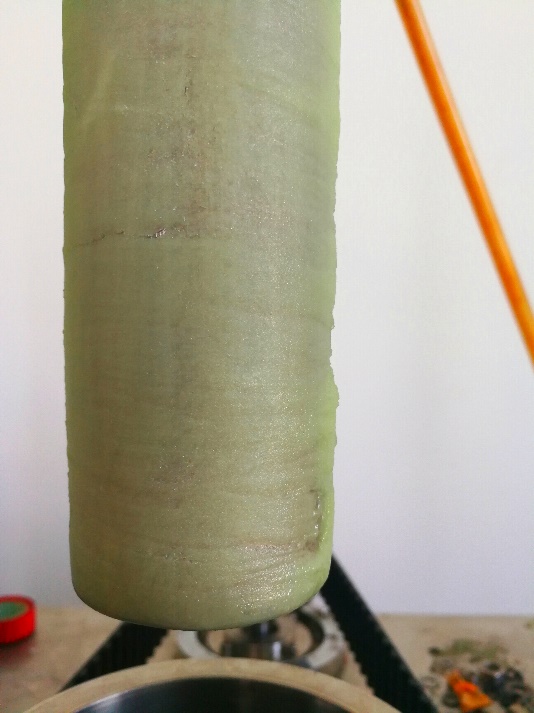
**(b)**

**Figure S6.** Macroscopic morphologies of the surface (a) and bottom (b) wax deposits formed by synthetic oil Ⅴ at 6h, and DSC properties (c) and wax precipitation characteristics (d) of the surface/bottom wax deposit.
